# Supplementary material for: Hydrothermal formose reaction
Source: Royal Society of Chemistry journal article supplement (doi:10.1039/c1nj20191c), 2011-01-01
Supplement: c1nj20191c.pdf [file c1nj20191c.pdf]

## Hydrothermal formose reaction

### Moderate temperature experiments, NMR and GC data

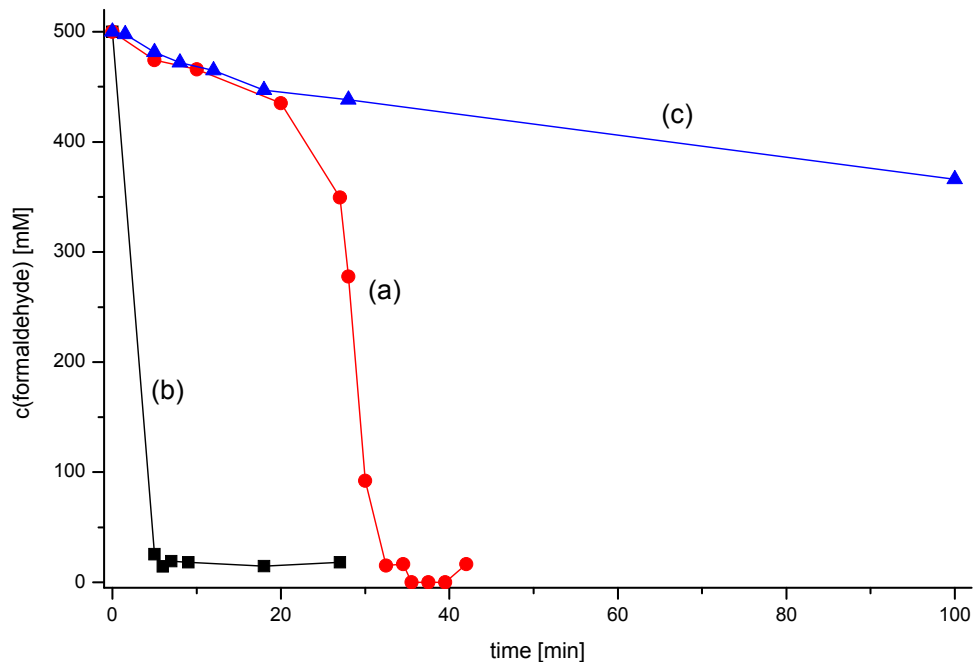

Fig. 1S: Conversion of 0.5 M formaldehyde at 60 °C in a) 0.05 M Ca(OH)<sub>2</sub>; b) 0.05 M Ca(OH)<sub>2</sub> with 1 mol% glycolaldehyde and c) 0.1 M NaOH with 1 mol% glycolaldehyde.

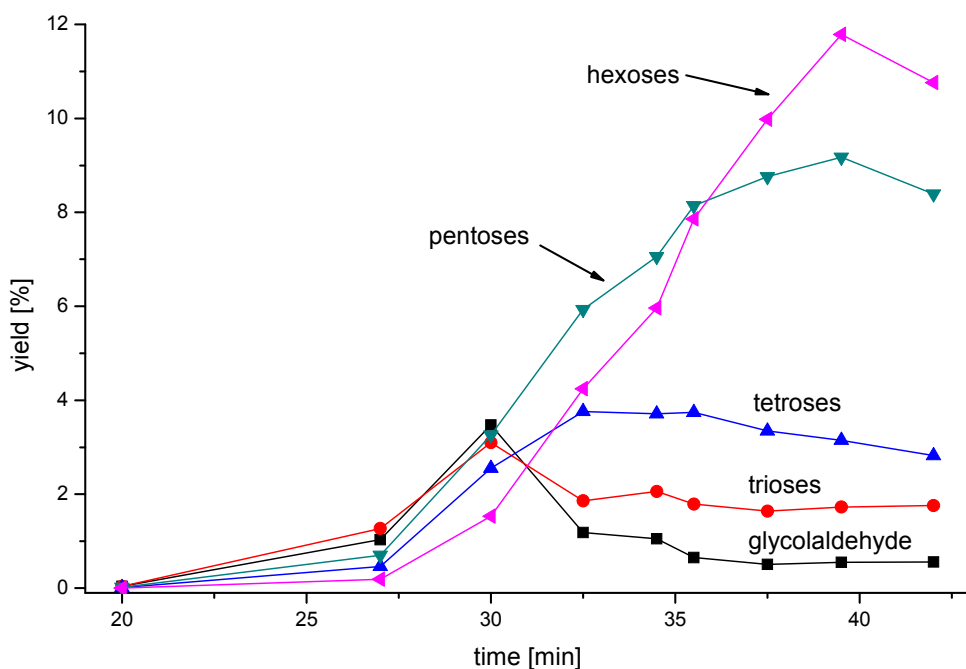

Fig. 2S: Kinetics of carbohydrate formation at 60 °C of 0.5 M formaldehyde in 0.05 M Ca(OH)<sub>2</sub> without initiator.

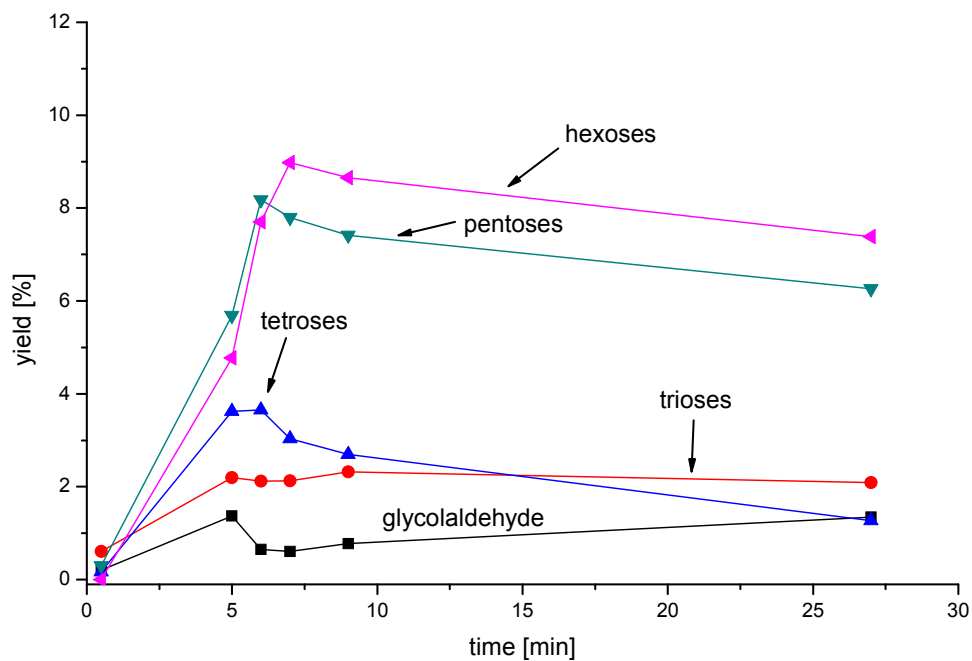

**Fig. 3S:** Kinetics of carbohydrate formation at 60 °C of 0.5 M formaldehyde in 0.05 M Ca(OH)<sub>2</sub> with 1 mol% glycolaldehyde as initiator.

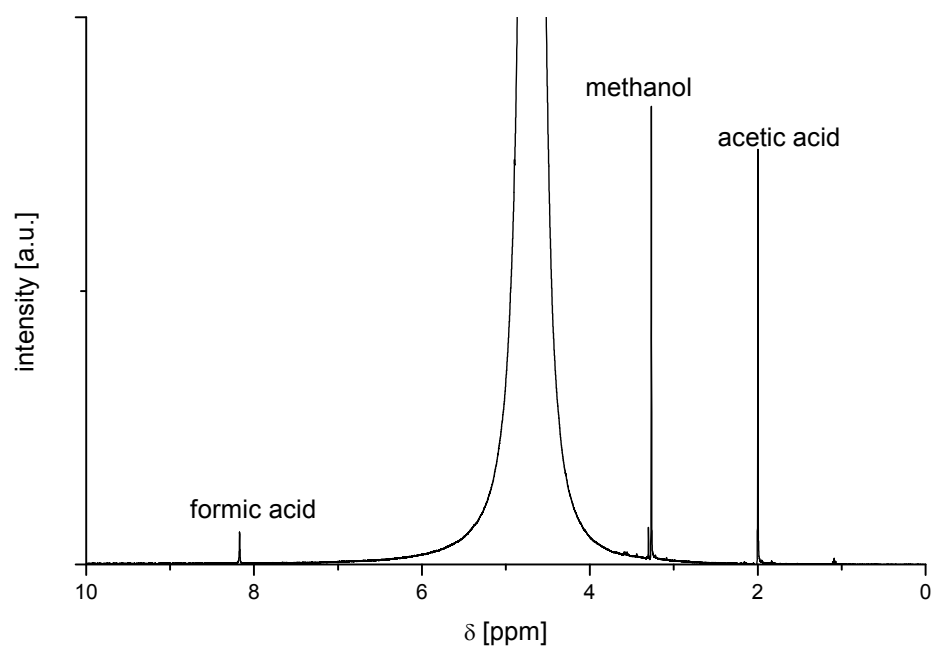

**Fig. 4S:** <sup>1</sup>H-NMR spectrum of the hydrothermal formose reaction of 0.5 M formaldehyde in 0.1 M acetic acid just shows the Cannizzaro products methanol and formic acid; reaction time 5.8 minutes at 200 °C and 100 bar.

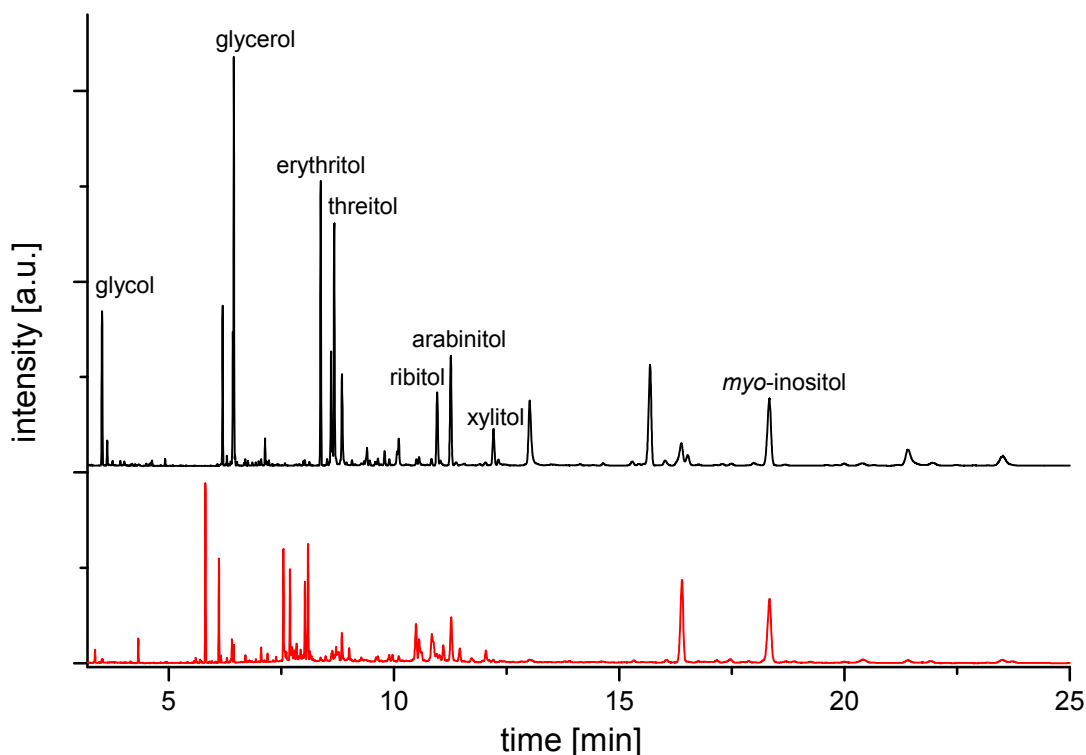

Fig. 5S: GC traces of a 0.5 M formaldehyde solution in 0.1 M  $K_2HPO_4$  reacted for 0.81 min at 200 °C and 100 bar; upper chromatogram was obtained after reduction with  $NaBH_4$  and acetylation, lower one is from a directly acetylated reaction mixture. Only marginal amounts of sugar alcohols are present after reaction.

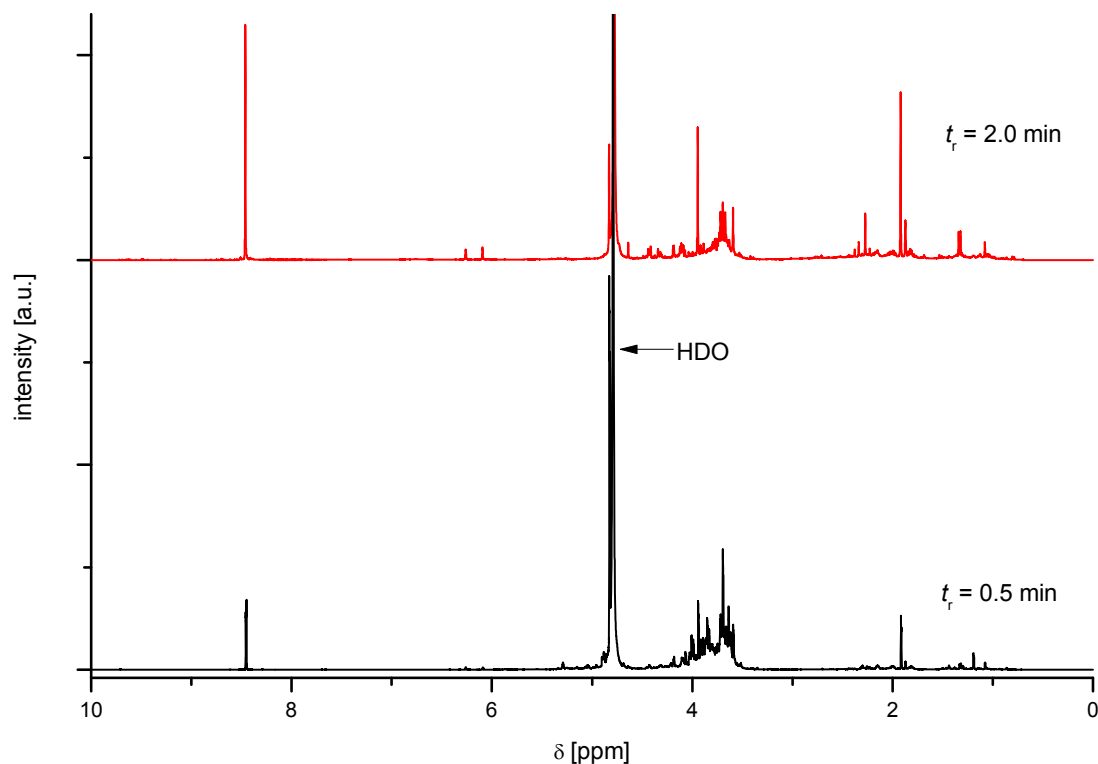

Fig. 6S:  $^1H$ -NMR spectra of a formose reaction with 0.5 M formaldehyde in 0.1 M  $NaHCO_3$  at 200 °C and 100 bar with 1 mol% dihydroxyacetone added. The lower spectrum was obtained after 0.5 min reaction time, around the yellowing point and the upper one after 2 min; spectra recorded in  $D_2O$ .

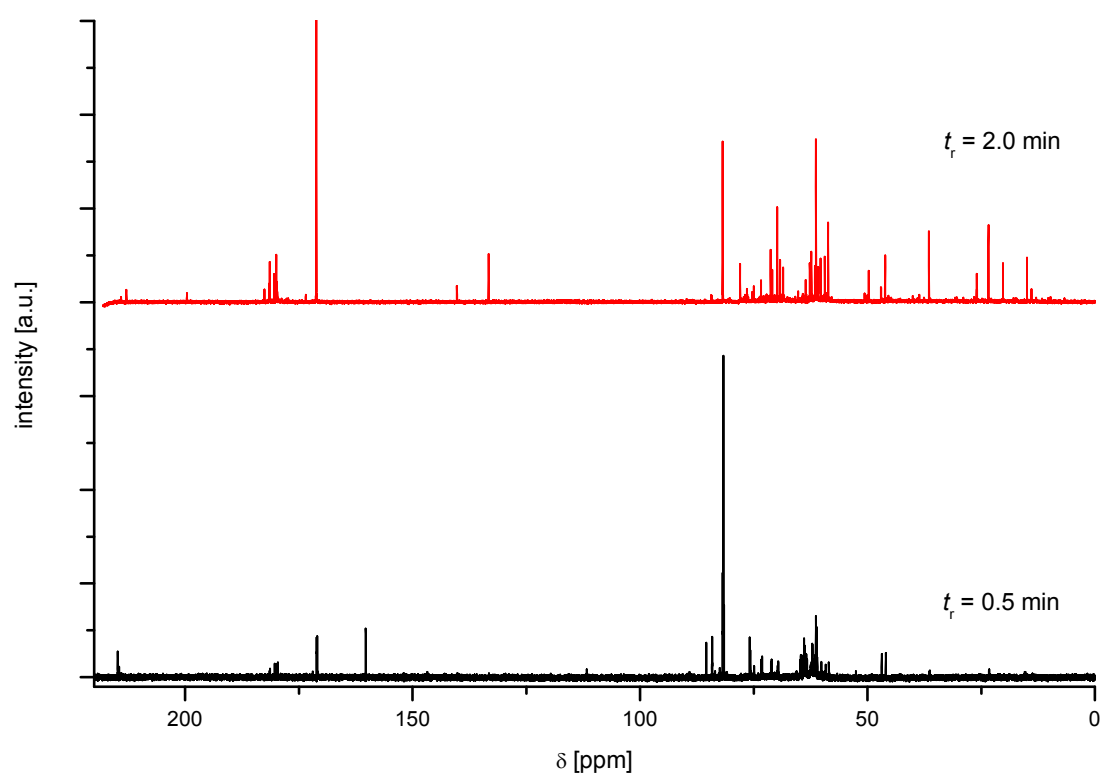

**Fig. 7S:**  $^{13}\text{C}$ -NMR spectra of a formose reaction with 0.5 M formaldehyde in 0.1 M  $\text{NaHCO}_3$  at 200 °C and 100 bar with 1 mol% dihydroxyacetone added. The lower spectrum was obtained after 0.5 min reaction time, around the yellowing point and the upper one after 2 min; spectra recorded in  $\text{D}_2\text{O}$ .

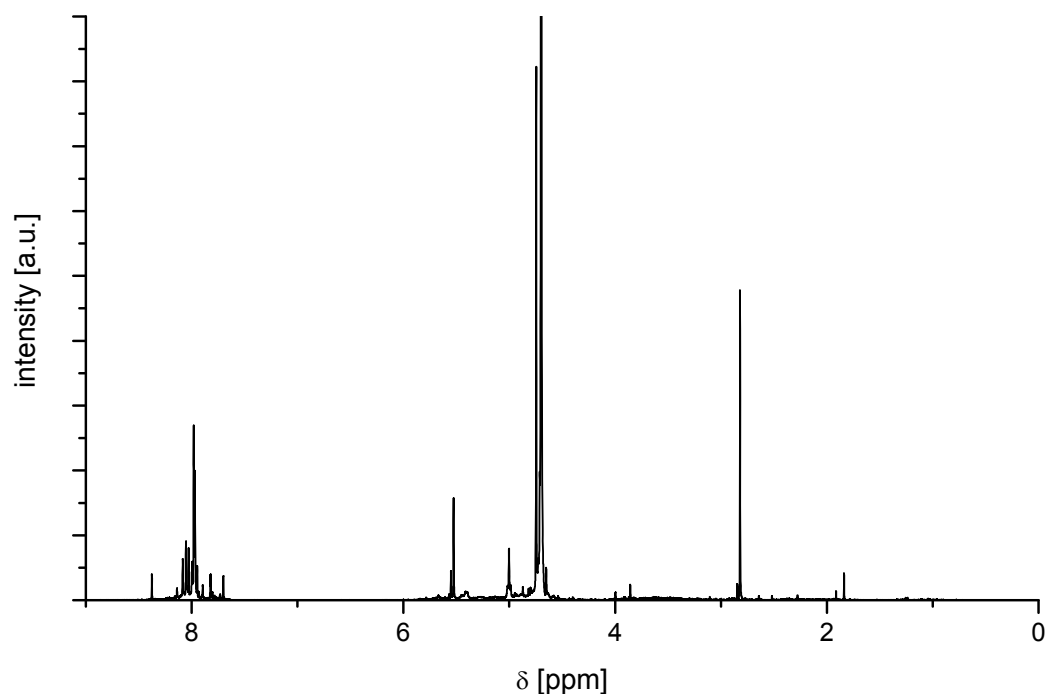

**Fig. 8S:**  $^1\text{H}$ -NMR of the reaction of 0.5 M formaldehyde with 0.1 M adenine at 200 °C and 100 bar for 5.2 minutes lacks of peaks corresponding to carbohydrates; recorded in  $\text{D}_2\text{O}$

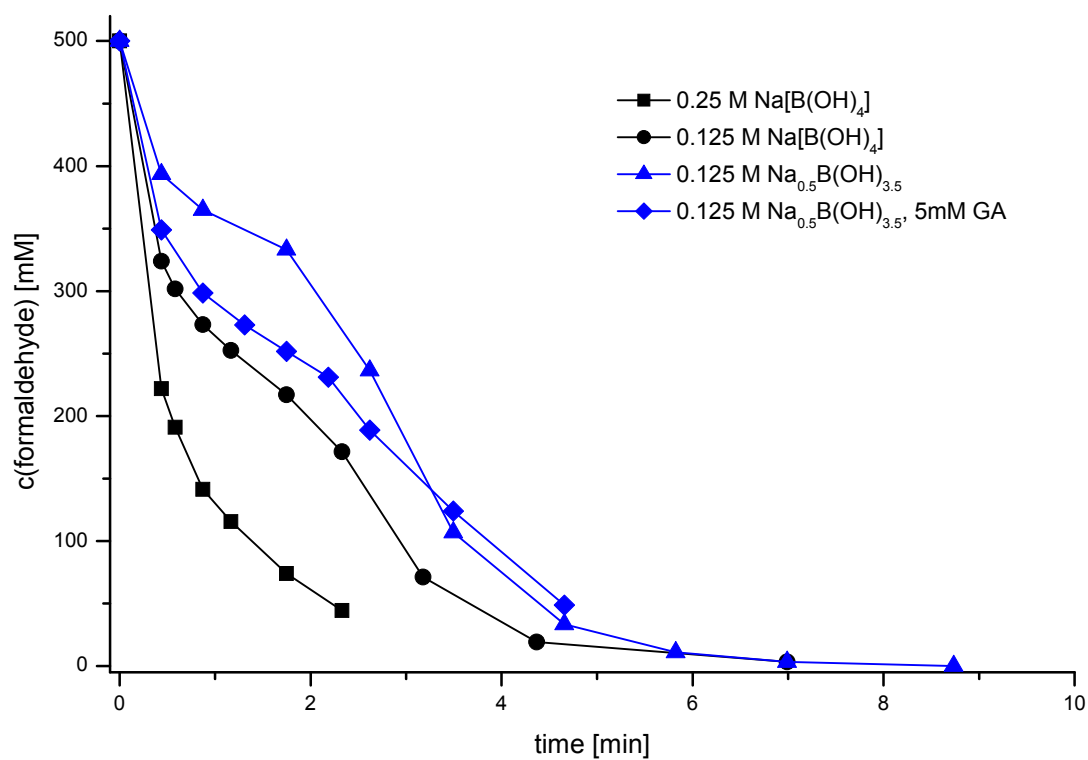

**Fig. 9S:** Conversion of 0.5 M formaldehyde at 200 °C and 100 bar in presence of borate (black curves) and borate buffer (blue curves).
